# Supplementary material for: Global cross-sectional student survey on AI in medical, dental, and veterinary education and practice at 192 faculties
Source: PubMed Central journal article supplement (PMC11439199; doi:10.1186/s12909-024-06035-4), 2024-09-28

## Degree Distribution

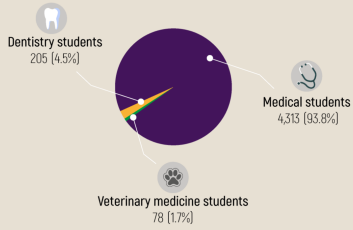

## Gender Distribution

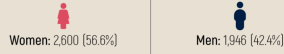

## AI Diagnostics Preference

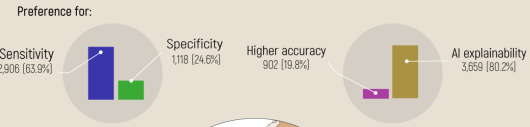

## Age Distribution

Median Age: 22 years (IQR: 20-24 years)

North America  
515 (11.2%)

Europe  
2,350 (51.2%)

Asia  
944 (20.5%)

Africa  
125 (2.7%)

Australia  
104 (2.3%)

South America  
555 (12.1%)

## Concerns

3,171 (69.4%)  
Believe AI will lead to legal and ethical issues

1,015 (22.2%)  
Feel prepared to use AI as a future physician

## AI Education and Knowledge

Students without curricular events on AI:  
3,467 (76.3%)

Desire for more AI teaching:  
3,474 (76.1%)

No or little knowledge of AI:  
3,451 (75.3%)

## AI in Medical Profession

AI will enhance healthcare efficiency:  
4,042 (88.4%)

Positive attitude on AI in medicine:  
3,081 (67.6%)

Physicians need AI to stay competitive:  
2,803 (61.2%)

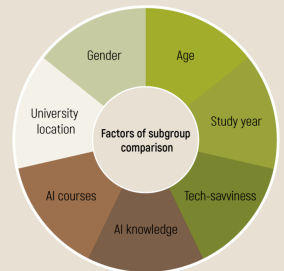

Supplement: 12909_2024_6035_MOESM1_ESM.pdf [file 12909_2024_6035_MOESM1_ESM.pdf]
